# Supplementary material for: Cisplatin or LA-12 enhance killing effects of TRAIL in prostate cancer cells through Bid-dependent stimulation of mitochondrial apoptotic pathway but not caspase-10
Source: PubMed Central journal article supplement (PMC5705153; doi:10.1371/journal.pone.0188584), 2017-11-28
Supplement: pone.0188584.s001.pdf [file pone.0188584.s001.pdf]

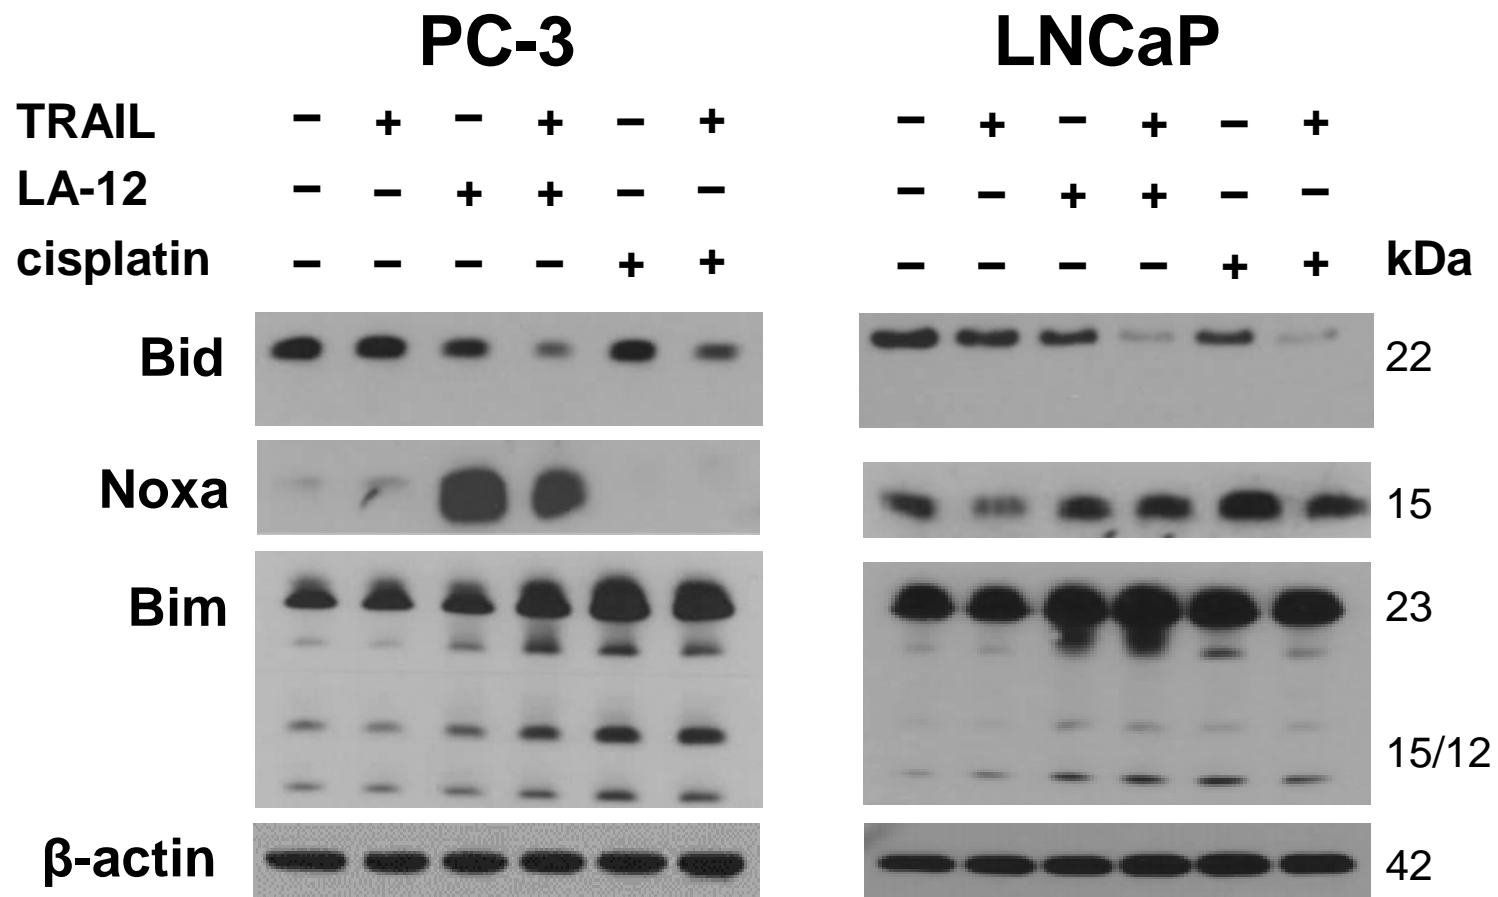

**S1 Modulation of selected BH3-only protein levels in PC-3 and LNCaP cells treated with LA-12/cisplatin and TRAIL.** The level of Bid, Noxa and Bim in PC-3 and LNCaP cells pretreated (24 h) with LA-12 (0.5/2.5  $\mu$ M) or cisplatin (10/5  $\mu$ M) and treated (4 h) with TRAIL (5/20 ng/ml), respectively, detected by Western blotting.  $\beta$ -actin served as a loading control. Results are representative of at least three independent experiments.
