# Supplementary material for: Cisplatin or LA-12 enhance killing effects of TRAIL in prostate cancer cells through Bid-dependent stimulation of mitochondrial apoptotic pathway but not caspase-10
Source: PubMed Central journal article supplement (PMC5705153; doi:10.1371/journal.pone.0188584), 2017-11-28
Supplement: pone.0188584.s002.pdf [file pone.0188584.s002.pdf]

## PC-3

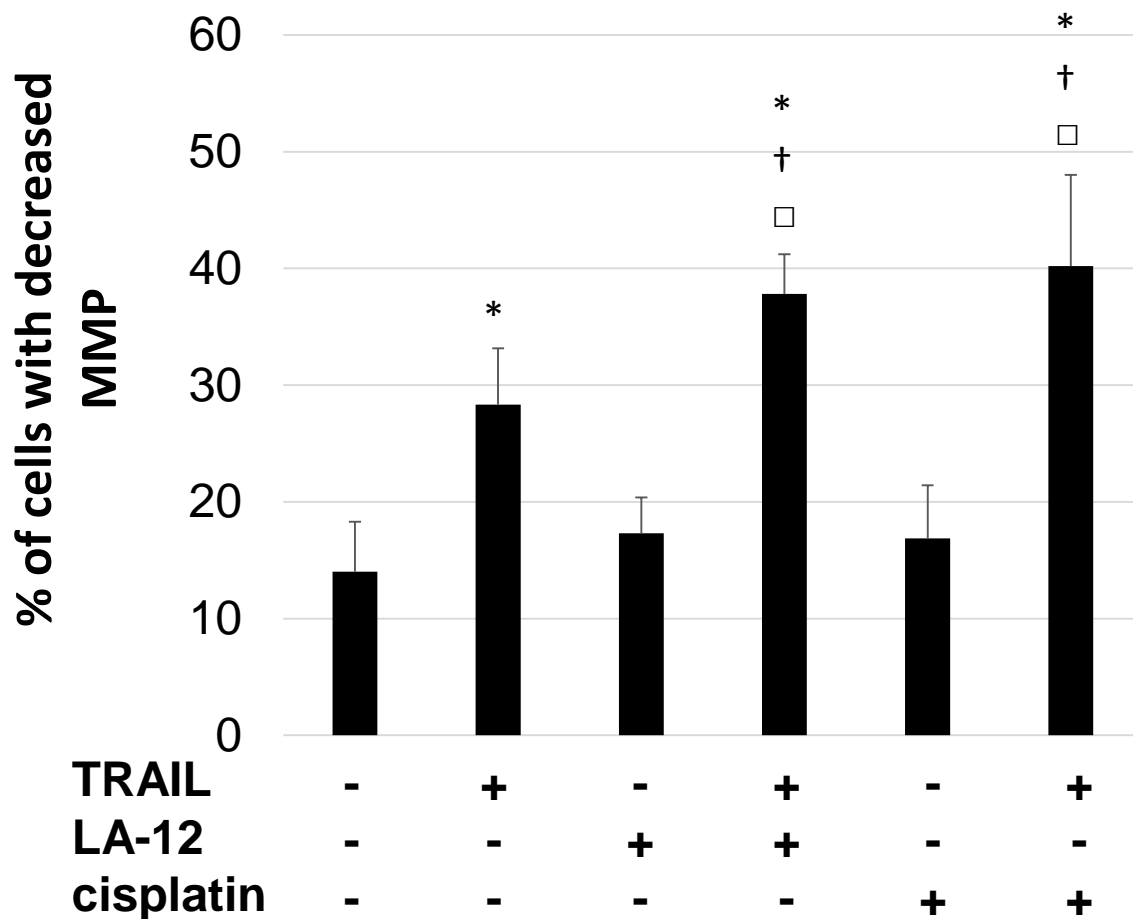

## LNCaP

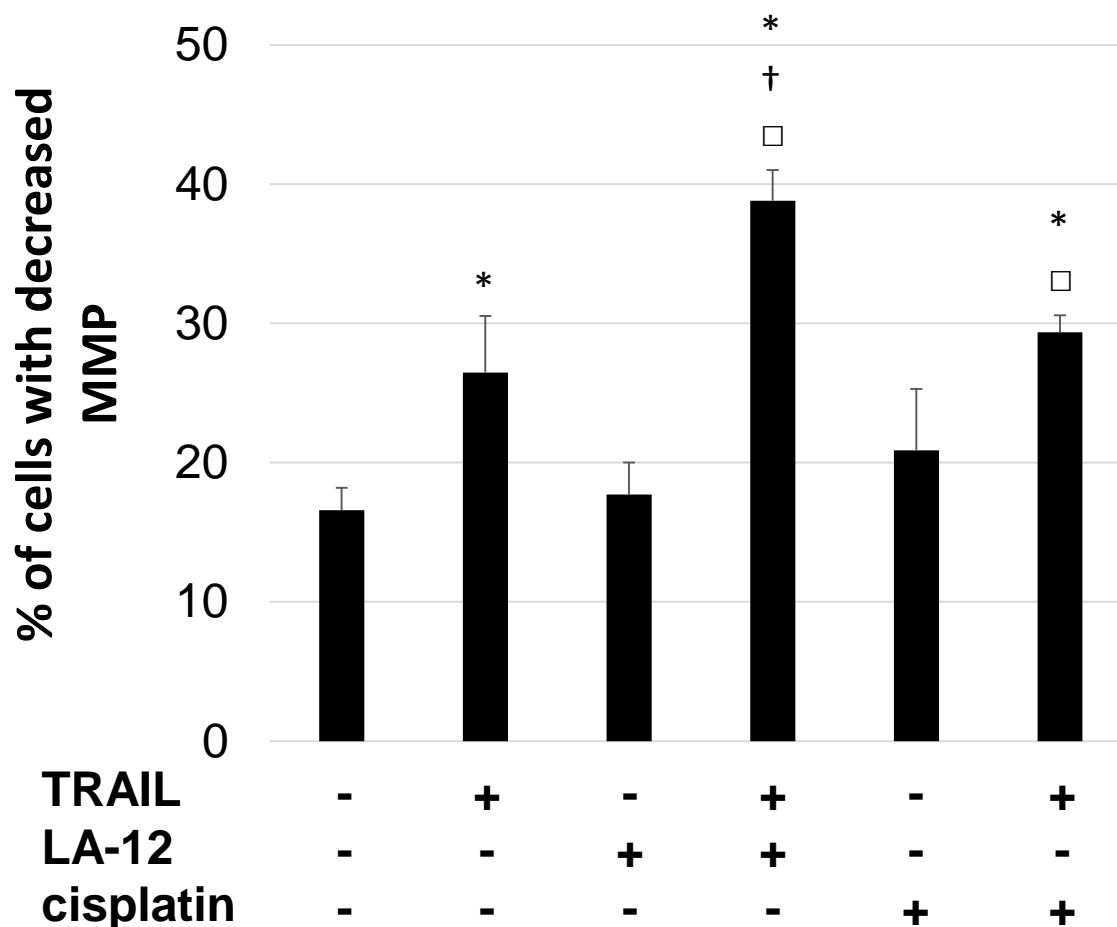

**S2 Changes in mitochondrial membrane potential (MMP) in PC-3 and LNCaP cells treated with LA-12/cisplatin and TRAIL.** Percentage of PC-3 and LNCaP cells with decreased MMP (TMRE assay, flow cytometry) following pretreatment (24 h) with LA-12 (0.5/2.5  $\mu$ M) or cisplatin (10/5  $\mu$ M) and treatment (4 h) with TRAIL (5/20 ng/ml), respectively. Results are means + S.E.M. of 3 independent experiments. Statistical significance ( $P < 0.05$ , \* vs. control, † vs. TRAIL, □ vs. appropriate platinum drug).
