# Supplementary material for: Cisplatin or LA-12 enhance killing effects of TRAIL in prostate cancer cells through Bid-dependent stimulation of mitochondrial apoptotic pathway but not caspase-10
Source: PubMed Central journal article supplement (PMC5705153; doi:10.1371/journal.pone.0188584), 2017-11-28
Supplement: pone.0188584.s004.pdf [file pone.0188584.s004.pdf]

**A**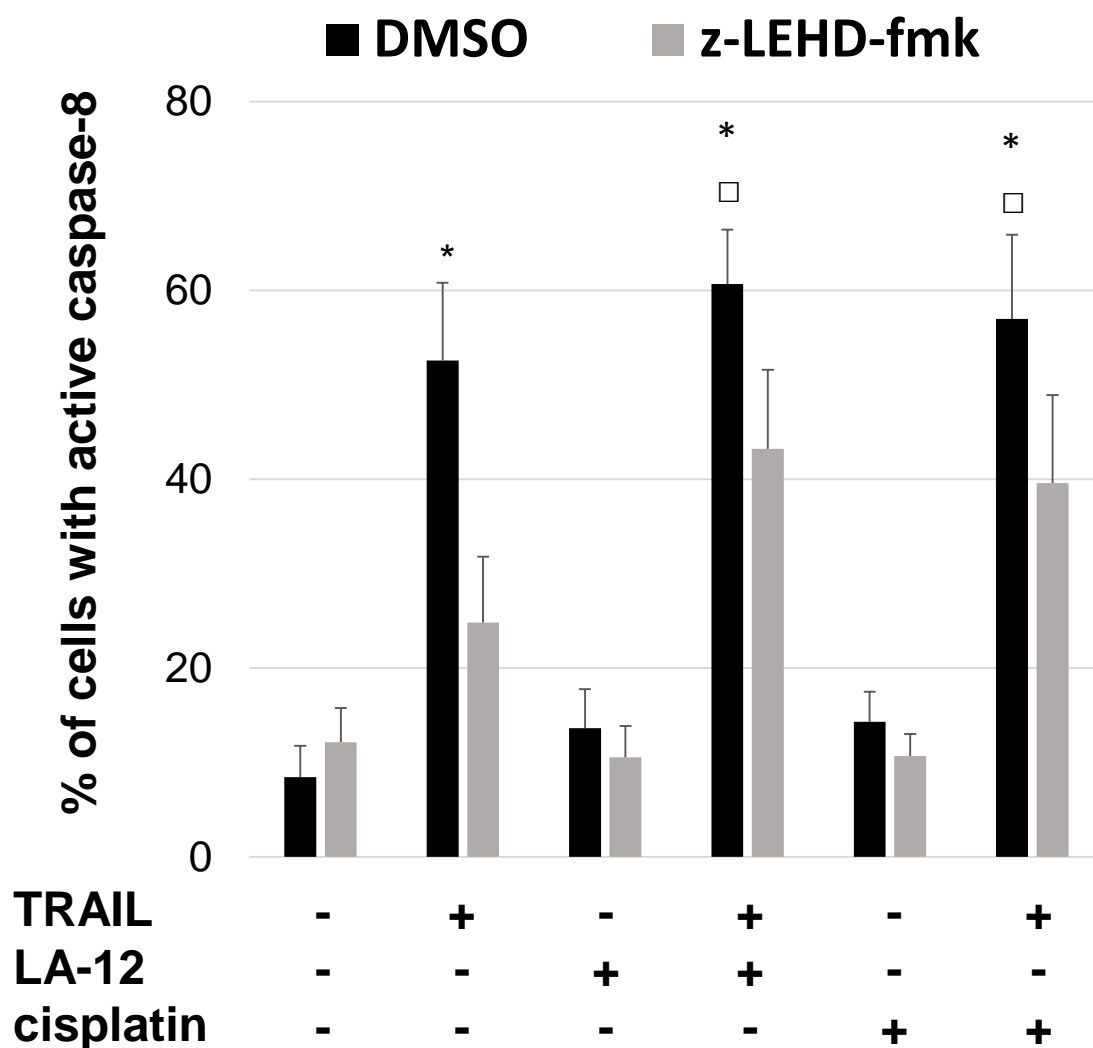**B**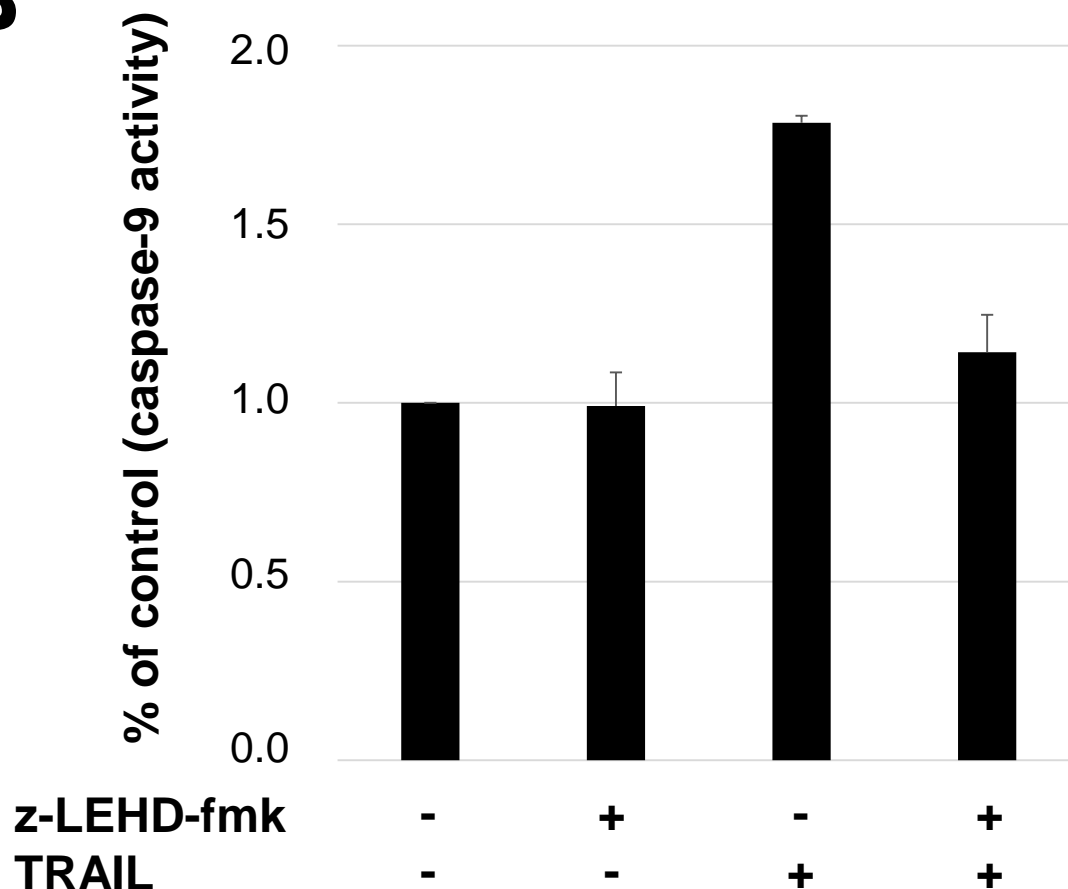

**S4 Z-LEHD-fmk mediated inhibition of caspase-8 activity in LA-12/cisplatin and TRAIL combination-induced DU 145 cells.** (A) Percentage of DU 145 cells with active caspase-8 (FLICA, flow cytometry) after pretreatment (1 h) with z-LEHD-fmk (20  $\mu$ M), treatment (24 h) with LA-12 (2.5  $\mu$ M) or cisplatin (5  $\mu$ M) and subsequent treatment (4 h) with TRAIL (5 ng/ml). Results are means + S.E.M. of 3 independent experiments. Statistical significance ( $P < 0.05$ , \* vs. control,  $\square$  vs. appropriate platinum drug). (B) Activity of caspase-9 (specific fluorogenic substrate) in HCT116 cells pretreated (1 h) with z-LEHD-fmk (20  $\mu$ M) and then treated (24 h) with TRAIL (50 ng/ml). Results are means + S.E.M. of 2 independent experiments.
