# Supplementary material for: Cisplatin or LA-12 enhance killing effects of TRAIL in prostate cancer cells through Bid-dependent stimulation of mitochondrial apoptotic pathway but not caspase-10
Source: PubMed Central journal article supplement (PMC5705153; doi:10.1371/journal.pone.0188584), 2017-11-28

# S8 Fig Original blots with markers for results presented in Figures 1-7.

## Figure 1

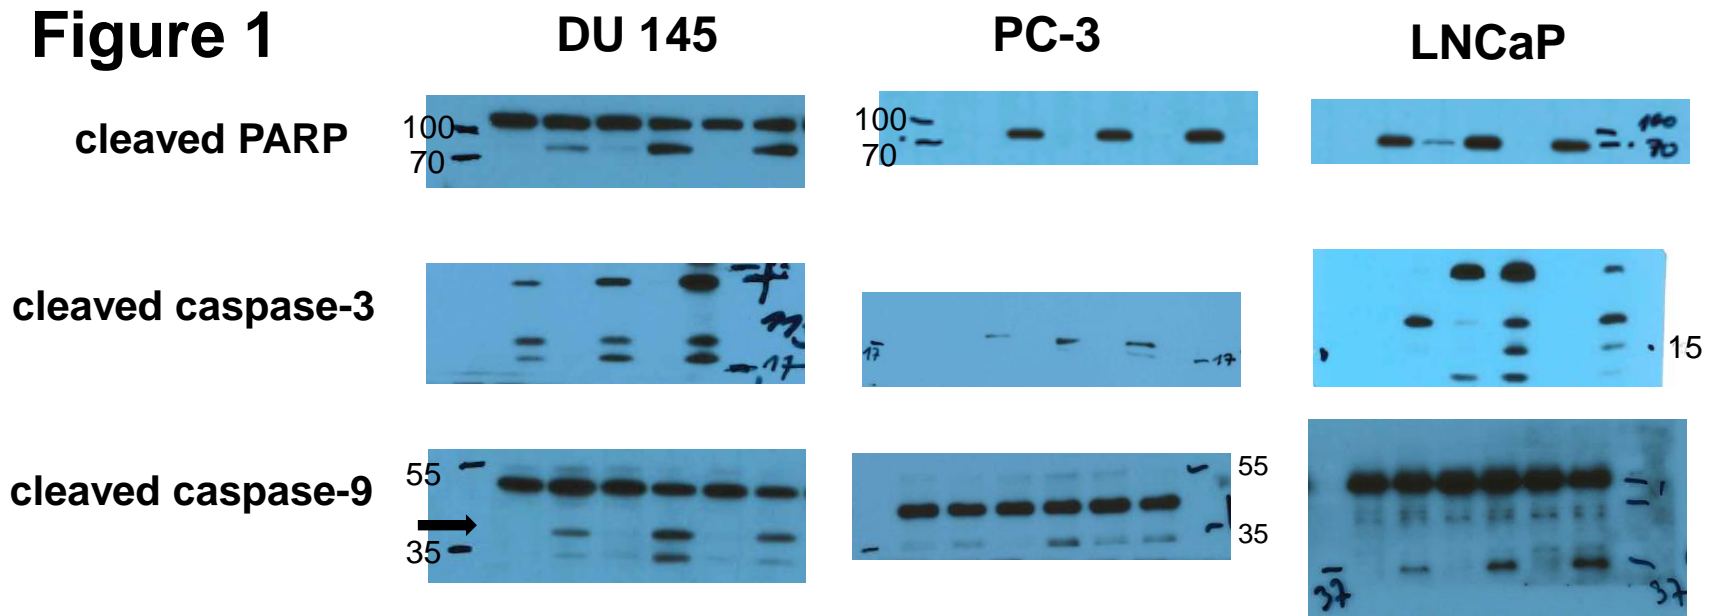

## Figure 2

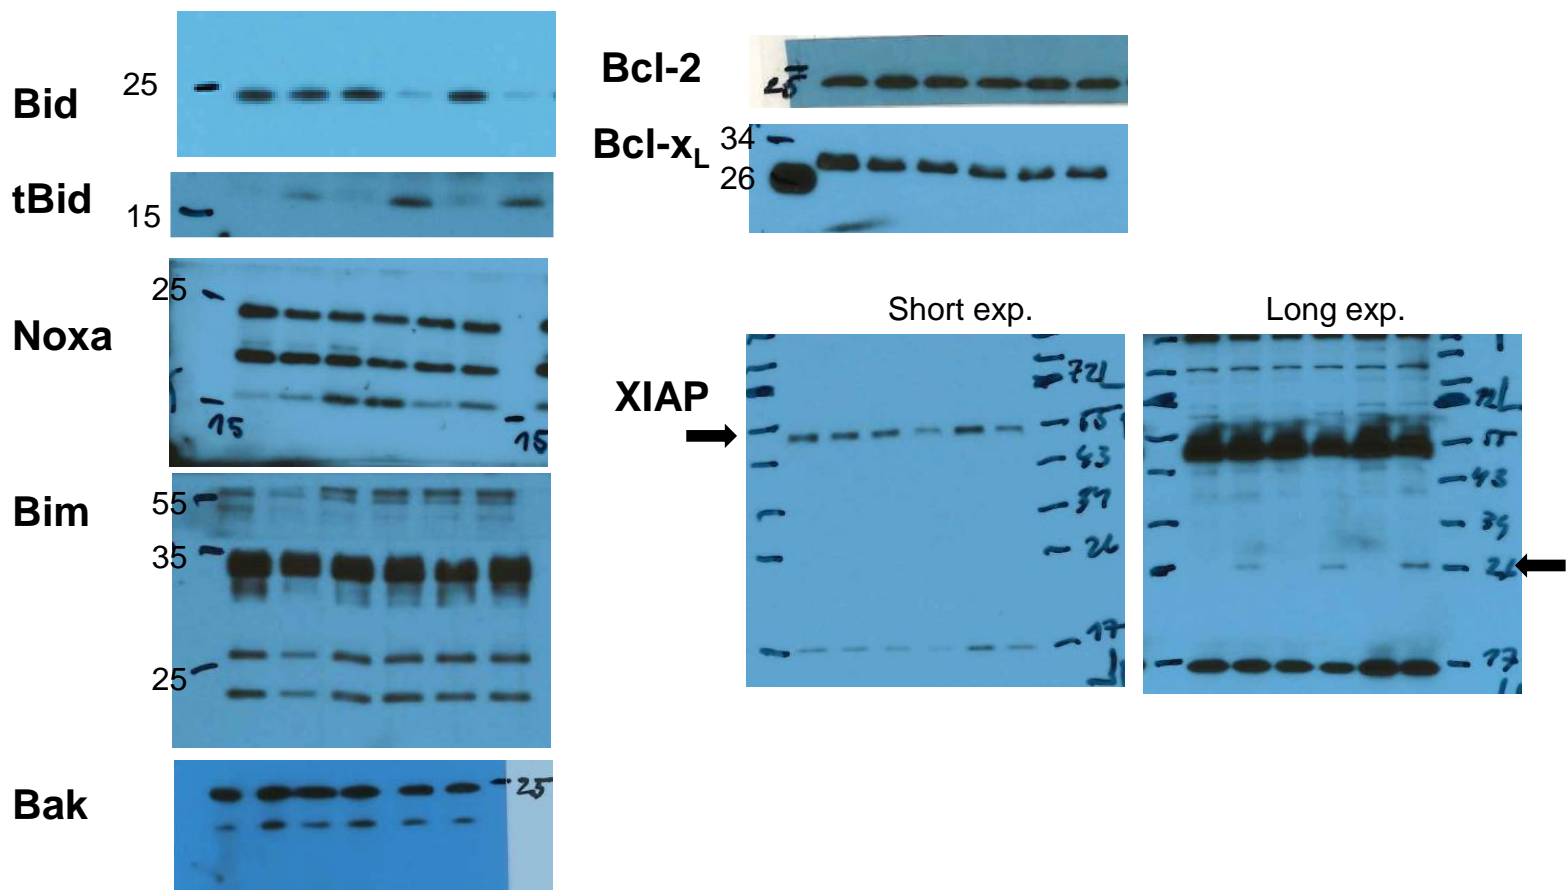

### Figure 3

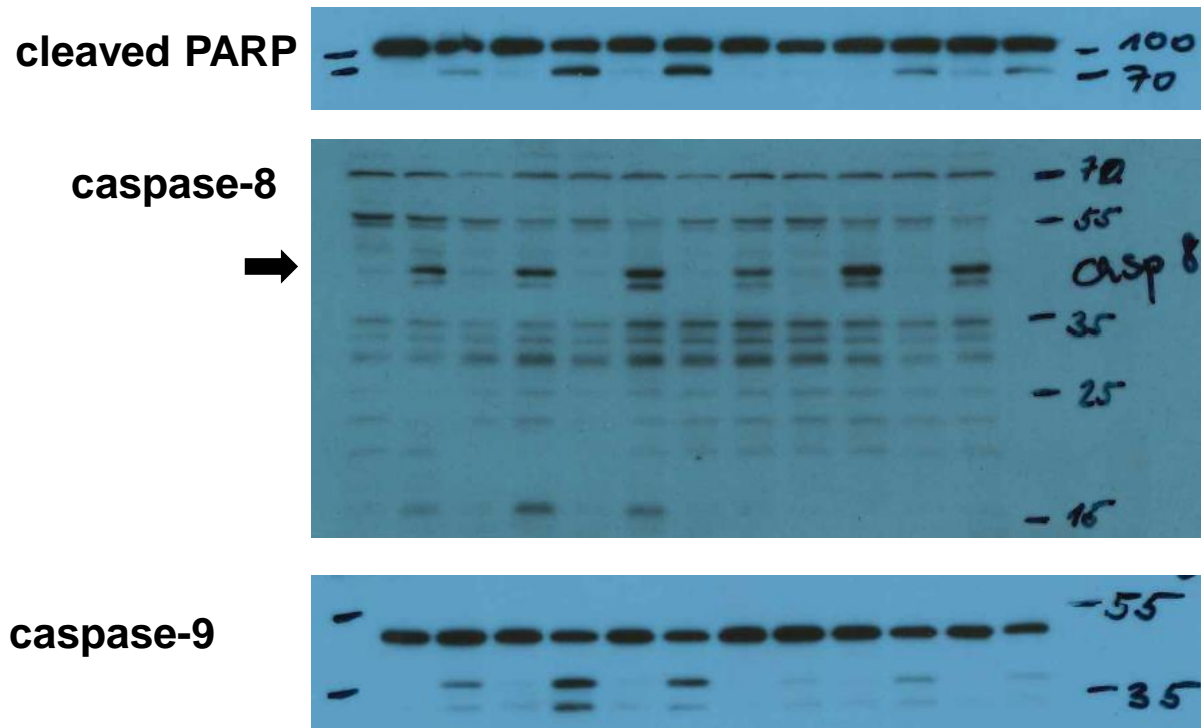

### Figure 4

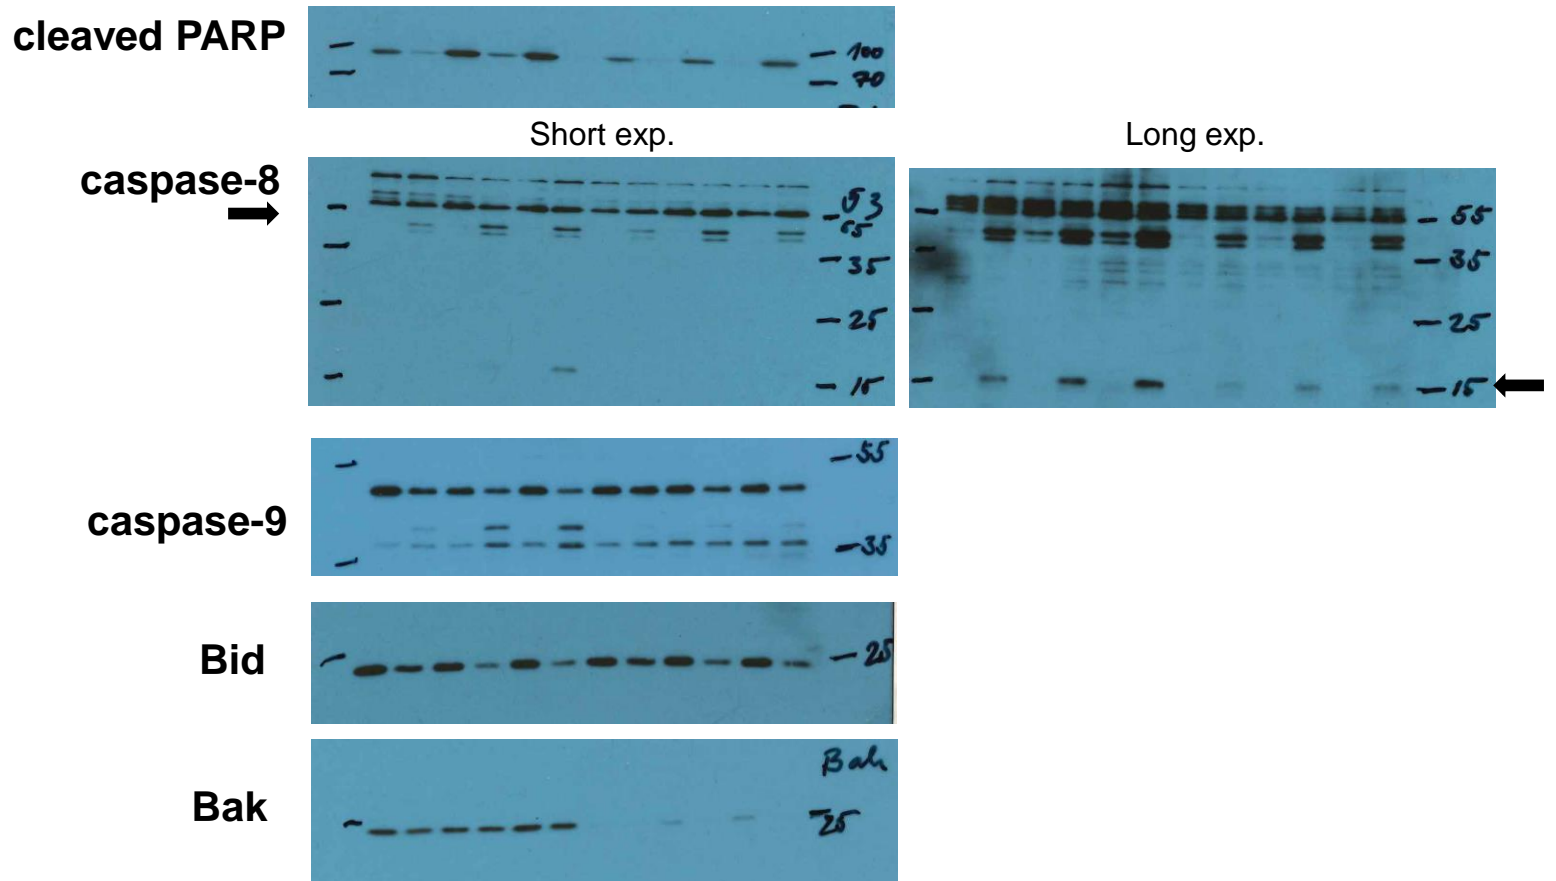

### Figure 5

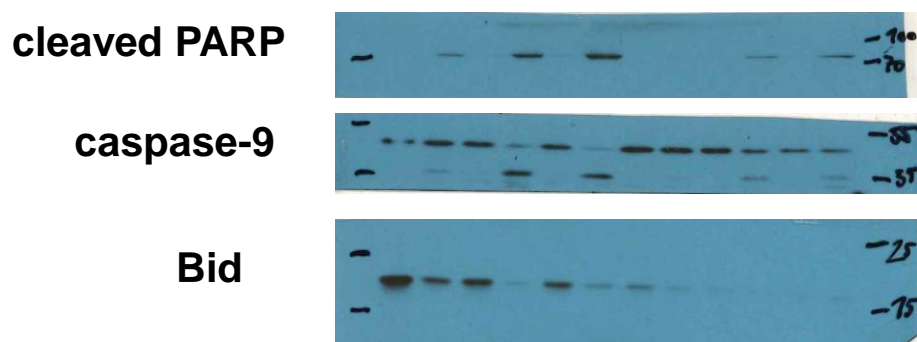

**Figure 6**

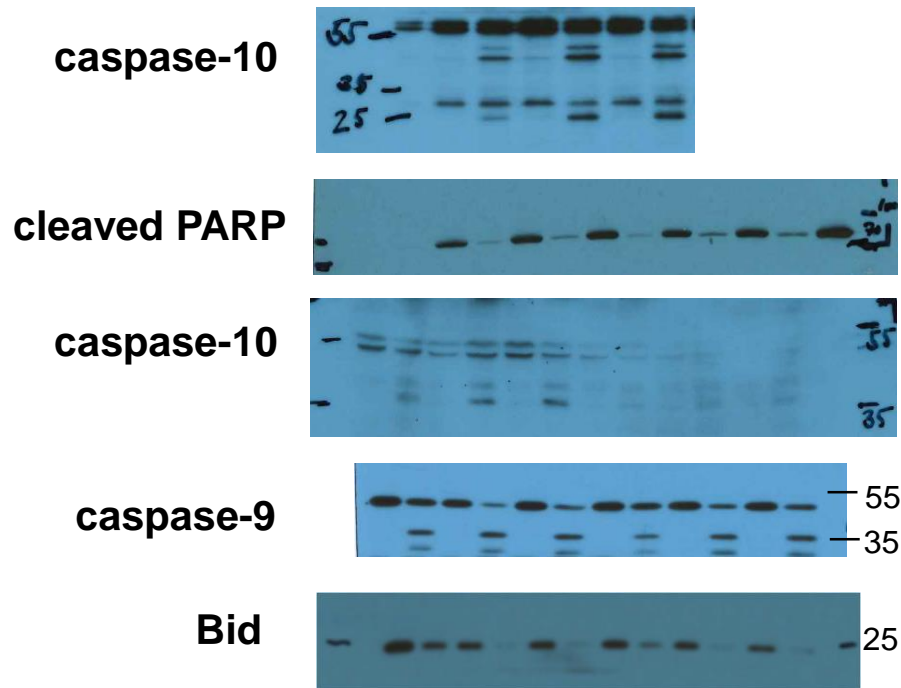

**Figure 7**

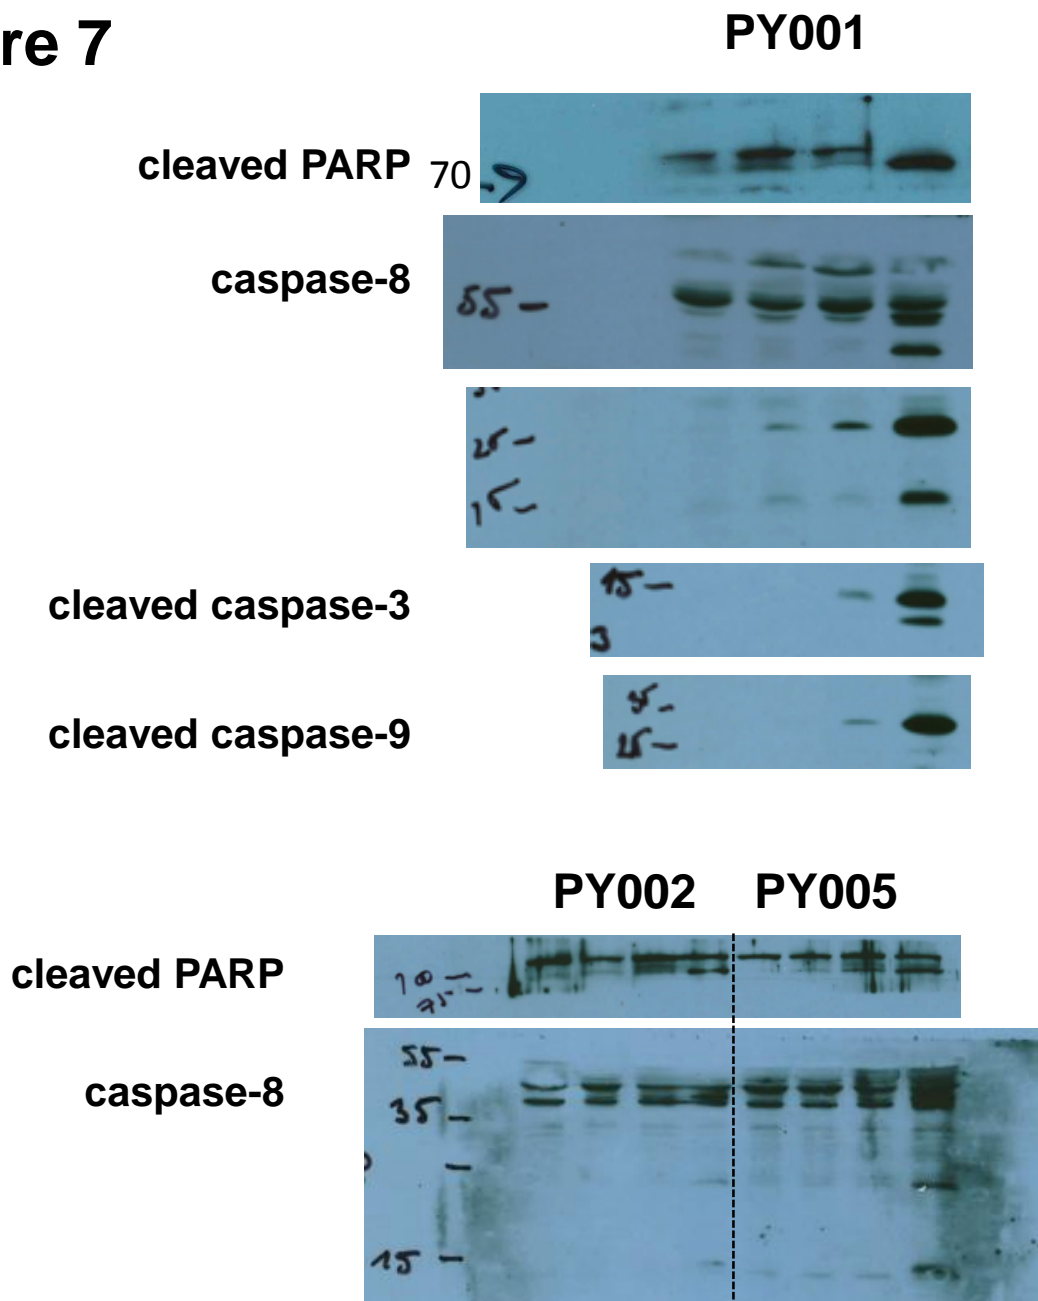

Supplement: pone.0188584.s008.pdf [file pone.0188584.s008.pdf]
