# Supplementary material for: Cisplatin or LA-12 enhance killing effects of TRAIL in prostate cancer cells through Bid-dependent stimulation of mitochondrial apoptotic pathway but not caspase-10
Source: PubMed Central journal article supplement (PMC5705153; doi:10.1371/journal.pone.0188584), 2017-11-28

# S9 Fig Original blots with markers for results presented in Supplementary figures.

## S1

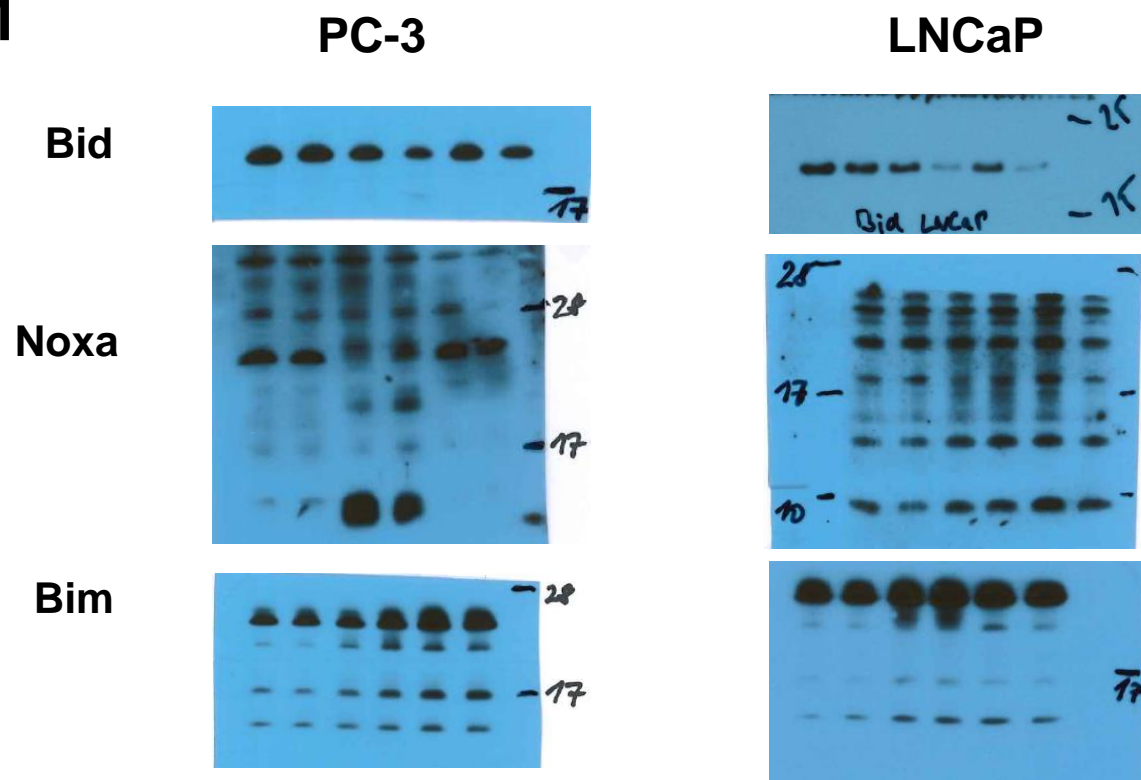

## S3

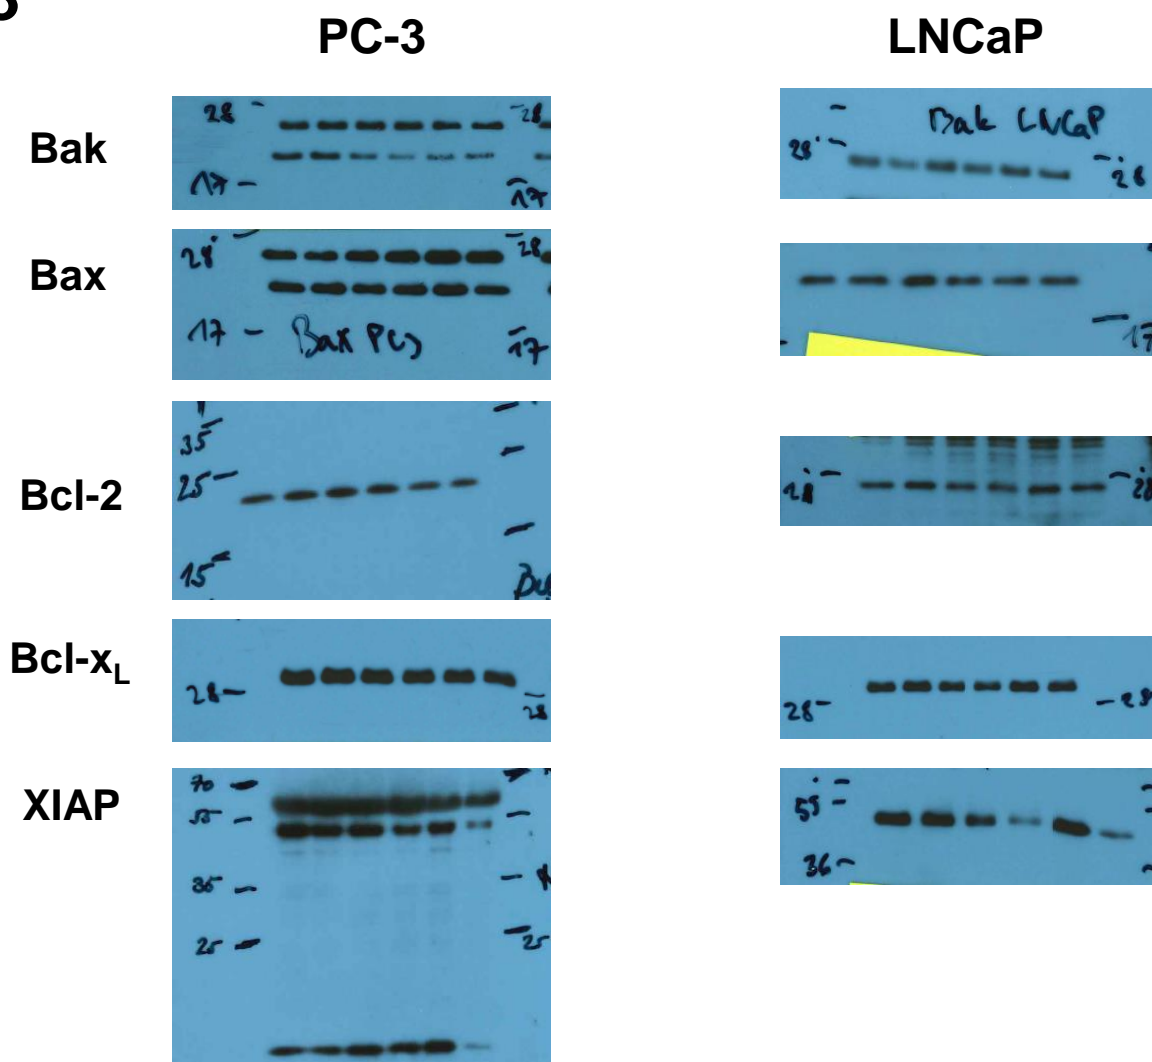

## S6

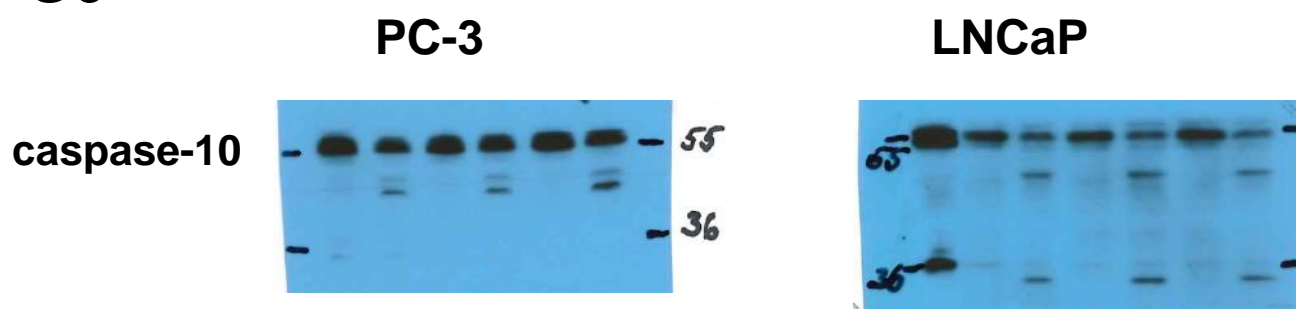

Supplement: pone.0188584.s009.pdf [file pone.0188584.s009.pdf]
