# Supplementary material for: Cisplatin or LA-12 enhance killing effects of TRAIL in prostate cancer cells through Bid-dependent stimulation of mitochondrial apoptotic pathway but not caspase-10
Source: PubMed Central journal article supplement (PMC5705153; doi:10.1371/journal.pone.0188584), 2017-11-28
Supplement: pone.0188584.s010.pdf [file pone.0188584.s010.pdf]

## Supplementary Material and Methods

### Cell culture

Human colon adenocarcinoma cells HCT116 (obtained from prof. B. Vogelstein) were cultured in McCoy's 5A-modified medium (Gibco, Thermo Fisher Scientific) supplemented with penicillin (100 U/ml) and streptomycin (0.1 mg/ml) (both Duchefa Biochemie B. V.) and 10% fetal bovine serum (Gibco, Thermo Fisher Scientific). All cells were cultured and treated as specified in Material and Method section. In addition, calpain inhibitor - calpeptin was used (10  $\mu$ M in DMSO, #03-34-0051, Calbiochem).

### Immunoblotting analysis

In addition to the information specified in Material and Method section, immunodetection was carried out with polyclonal rabbit anti-Bax antibody produced by immunizing animals with a synthetic peptide corresponding to the amino-terminal residues of human Bax (1:1000, #2772, Cell Signaling Technology).

### FLICA caspase-8 activity

The cells were harvested by trypsinization and stained in fresh culture media with FAM-FLICA (1:30, FAM-FLICA Caspase-8 kit, AbD Serotec, BioRad, USA) according to manufacturer's instructions. The percentage of cells with active caspase-8 was assessed by flow cytometry (FACS Verse) and analyzed by BD FACSuite v1.0.5 (both Becton Dickinson). Minimum of 10000 cells excluding debris and doublets were subjected to analysis.

### Fluorimetric detection of caspase-9 activity

The cells were lysed in lysis buffer (50 mM HEPES, 5 mM CHAPS, 5 mM DTT, 1  $\mu$ M aprotinin; Sigma-Aldrich) on ice for 20 min and then centrifuged at 15000 g for 15 min at 4 °C. The proteins acquired (equal concentrations) were incubated with caspase-9 substrate (Ac-LEHD-AFC, ALX-260-116-M005; Alexis Biochemicals Corporation, Lausen, Switzerland) overnight in assay buffer (20 mM HEPES, 2.5 mM CHAPS, 5 mM DTT, 2 mM EDTA) at 37

°C. Fluorescence was measured using Fluostar Galaxy fluorometer (BMG Labtechnologies; Offenburg, Germany).

#### CyQuant – Cell proliferation assay

Following the treatment in 96 well plate, the medium was aspirated and cells were incubated with the dye binding solution from the CyQUANT® NF Cell Proliferation Assay Kit (Invitrogen) according to the manufactures protocol. Finally, fluorescence was measured in a microplate reader FLUOSTAR Galaxy (BMG Labtechnologies GmbH, Offenburg, Germany).
